1 Physiologically driven, altitude-adaptive model for the  
2 interpretation of pediatric oxygen saturation at altitudes above  
3 2000 m a.s.l.

4 Laura Tüshaus<sup>1\*</sup>, Monica Moreo<sup>1\*</sup>, Jia Zhang<sup>1</sup>, Stella Maria Hartinger<sup>2,3,4</sup>, Daniel Mäusezahl<sup>3,4</sup>, Walter Karlen<sup>1</sup>

5 <sup>1</sup> *Mobile Health Systems Lab, Institute for Robotics and Intelligent Systems, Department of Health  
6 Sciences and Technology, ETH Zurich, Switzerland*

7 <sup>2</sup> *Universidad Peruana Cayetano Heredia, Lima, Peru*

8 <sup>3</sup> *Department of Epidemiology & Public Health, Swiss Tropical and Public Health Institute (Swiss TPH),  
9 Basel, Switzerland*

10 <sup>4</sup> *University of Basel, Basel, Switzerland*

11 *\* Authors contributed equally to the manuscript*

12

13

14 Corresponding Author:

15 Prof. Dr. Walter Karlen

16 ETH Zurich, Mobile Health Systems Lab, Institute of Robotics and Intelligent systems, Department of  
17 Health Sciences and Technology, BAA, Lengghalde 5, 8092 Zurich, Switzerland

18 [walter.karlen@ieee.org](mailto:walter.karlen@ieee.org)

19

20

## 21 **ABSTRACT**

22 Measuring peripheral oxygen saturation (SpO<sub>2</sub>) with pulse oximeters at the point of care is widely established.  
23 However, since SpO<sub>2</sub> is dependent on ambient atmospheric pressure, the distribution of SpO<sub>2</sub> values in populations  
24 living above 2000 m a.s.l. is largely unknown. Here, we propose and evaluate a computer model to predict SpO<sub>2</sub>  
25 values for pediatric permanent residents living between 0 and 4000 m a.s.l. Based on a sensitivity analysis of  
26 oxygen transport parameters, we created an altitude-adaptive SpO<sub>2</sub> model that takes physiological adaptation of  
27 permanent residents into account. From this model, we derived an altitude-adaptive abnormal SpO<sub>2</sub> threshold  
28 using patient parameters from literature. We compared the obtained model and threshold against a previously  
29 proposed threshold derived statistically from data and two empirical datasets independently recorded from  
30 Peruvian children living at altitudes up to 4100 m a.s.l. Our model followed the trends of empirical data, with the  
31 empirical data having a narrower healthy SpO<sub>2</sub> range below 2000 m a.s.l., but the medians did never differ more  
32 than 2.29% across all altitudes. Our threshold estimated abnormal SpO<sub>2</sub> in only 17 out of 5981 (0.3%) healthy  
33 recordings, whereas the statistical threshold returned 95 (1.6%) recordings outside the healthy range. The strength  
34 of our parametrised model is that it is rooted in physiology-derived equations and enables customisation.  
35 Furthermore, as it provides a reference SpO<sub>2</sub>, it could assist practitioners in interpreting SpO<sub>2</sub> values for diagnosis,  
36 prognosis, and oxygen administration at higher altitudes.

## 37 **New & Noteworthy**

38 Our model describes the altitude-dependent decrease of SpO<sub>2</sub> in healthy pediatric residents based on physiological  
39 equations and can be adapted based on measureable clinical parameters. The proposed altitude-specific abnormal  
40 SpO<sub>2</sub> threshold might be more appropriate than rigid guidelines for administering oxygen that currently are only  
41 available for sea level patients. We see this as a starting point to discuss and adapt oxygen administration  
42 guidelines.

43 **Keywords:** Hypoxemia, Altitude, Oxygen Saturation, Model, Child Health, Pneumonia, Physiological Adaptation.

## 44 INTRODUCTION

45 Acute lower respiratory infections (ALRI) are a major health burden in low- and middle-income countries.  
46 Childhood pneumonia accounts for 14% of all deaths in children worldwide under five years of age (45), of which  
47 95 % occur in low resource settings (41). Common conditions observed in ALRI are dyspnoea and hypoxemia, an  
48 abnormally low level of oxygen saturation in the arterial blood ( $\text{SaO}_2$ ), that can lead to cyanosis and subsequently  
49 to death (43). A rapid and non-invasive estimation of hypoxemia can be obtained through pulse oximetry that  
50 measures peripheral oxygen saturation ( $\text{SpO}_2$ ). Pulse oximetry has become a suitable technology for application in  
51 low resource settings due to the simplicity of use in combination with mobile phones and non-invasiveness of the  
52 device (20, 27). The use of pulse oximeters and supplemental oxygen in clinical applications at the point of care  
53 has shown to drastically reduce death rates (8). However, in countries where these devices are needed most,  
54 health personnel have only slowly started to gain access.

55 The interpretation of  $\text{SpO}_2$  values for hypoxemia is challenging, especially for health personnel not familiar with  
56 respiratory physiology and measurement principles of pulse oximeters. The World Health Organization (WHO)  
57 recommends the administration of oxygen when  $\text{SpO}_2$  drops below or is equal to 90% (44). This fixed threshold  
58 oversimplifies hypoxemia treatment (7). It does not provide an indication on when to stop treatment and does not  
59 permit adaptation to the local conditions. Namely, in many rural areas, oxygen is a scarce and precious resource  
60 and therefore only restrictively administered. Altitude has a direct influence on  $\text{SpO}_2$  as the air pressure decreases,  
61 and consequently, the alveolar oxygen partial pressure decreases with increasing altitude (43). Thus, the treatment  
62 of ALRI (i.e. administration of oxygen), diagnosis and prognosis, might be affected at higher altitudes and the  
63 recommended oxygen administration guidelines at sea level may not be applicable. However, before determining  
64 treatment thresholds at higher altitudes, healthy values in this environment need to be established.

65 In this work, we introduce an altitude-adaptive  $\text{SpO}_2$  model and propose a model-derived altitude-adaptive  
66 abnormal  $\text{SpO}_2$  threshold. The physiology-backed altitude-adaptive model describes  $\text{SpO}_2$  values of healthy  
67 children living permanently at altitudes up to 4000 m a.s.l. With this model, we aim to provide a better  
68 understanding of healthy  $\text{SpO}_2$  values at altitudes above 2000 m a.s.l. for healthy children. The altitude-adaptive  
69 abnormal  $\text{SpO}_2$  threshold is obtained by setting the model parameters to abnormal values found in hypoxemic  
70 patients. We evaluate these results with a novel dataset obtained from healthy children living in the rural Andes  
71 of Peru.

## 72 Related Work

73 The current literature presents two modelling approaches that describe the relationship between SpO<sub>2</sub> and  
74 altitude.

75 Subhi et al. developed a statistical model of the SpO<sub>2</sub> distribution across altitudes that is based on empirical  
76 observations from healthy children, and derived an altitude-adaptive threshold for hypoxemia from this model  
77 (40). Data were obtained through a literature review of studies performed between 0 and 4018 m a.s.l. A linear  
78 random effects meta-regression was performed to predict mean and 2.5<sup>th</sup> centile SpO<sub>2</sub> with an exponential  
79 equation. This 2.5<sup>th</sup> centile of healthy children's SpO<sub>2</sub> at each altitude was proposed as an altitude-adjusted  
80 hypoxemia threshold. It is unclear why this specific, statistically derived threshold was chosen. The obtained  
81 statistical model and threshold also did not take other influencing factors, such as measurement protocols, choice  
82 of oximeter technology, ethnicity and age range of the studied subjects, into account.

83 Our group developed a computer model that described the pathway of oxygen throughout the cardio-respiratory  
84 body compartments (24, 25). It implemented the oxygen cascade described by West (43). The model used well-  
85 established physiological equations to explain how the partial oxygen pressure and oxygen concentrations are  
86 interrelated between alveolar gas and peripheral blood (24) (Figure 1). The oxygen cascade describes the oxygen  
87 loss from the partial pressure of inspired air to the resulting measurements of SpO<sub>2</sub> by a pulse oximeter. Therefore,  
88 the model was based on physiological parameters and integrated pulse oximeter measurement inaccuracies as  
89 reported by the manufacturer. A shortcoming of the model was that it assumed many physiological parameters to  
90 be constant and therefore did not consider altitude adaptation. Consequently, it could not correctly describe SpO<sub>2</sub>  
91 measured at higher altitudes, especially in people adapted to these conditions such as permanent residents.

92 In a recent prospective study, Rojas-Camayo et al. recorded SpO<sub>2</sub> from 6289 subjects ranging from infants to elderly  
93 people in the Peruvian Andes at 15 altitudes from 154 m to 5100 m a.s.l. (36). They reported the 2.5<sup>th</sup>, 10<sup>th</sup>, 25<sup>th</sup>,  
94 50<sup>th</sup>, 75<sup>th</sup>, 90<sup>th</sup> and 97.5<sup>th</sup> centile of the empirical data. This data has not been used to derive a hypoxemia threshold  
95 thus far.

## 96 **MODELLING**

### 97 **Altitude-adaptive SpO<sub>2</sub> model**

98 Starting from the previously established computer model of the oxygen cascade (24), we modified this model to  
99 include physiological adaptation to high altitudes. We adjusted parameters that had been found to change with  
100 altitude in permanent residents (see Table 1 for an overview of all parameters used). Briefly, the existing model of  
101 the oxygen cascade described the pathway of oxygen throughout the cardio-respiratory body compartments  
102 (Figure 1) by using physiological equations (see appendix). The model was originally developed to estimate the  
103 “virtual shunt” (VS) describing the overall loss of oxygen content between the alveolar gas and arterial blood  
104 compartments (2), with SpO<sub>2</sub> and inspired oxygen (FiO<sub>2</sub>) values as input parameters. An increase in the VS is one  
105 of the main causes of hypoxemia (43).

106 The above mentioned oxygen cascade model, originally developed for adults, can be adapted to a pediatric model  
107 as there are no indications that the underlying physics of gas exchange are any different in children (28). We  
108 identified relationships between altitude adaptation and parameters of the oxygen cascade, such as atmospheric  
109 pressure, haemoglobin concentration (cHb), alveolar partial pressure of carbon dioxide (pACO<sub>2</sub>), and the  
110 respiratory quotient (RQ). In addition, we divided VS into two components (Figure 1): 1) incomplete capillary  
111 diffusion (diffusion defect between the alveolar and capillary, VS<sub>diff</sub>) and 2) incomplete perfusion with  
112 intrapulmonary shunt (perfusion defect, VS<sub>perf</sub>).

113 We made the following assumptions for the model of a healthy subject: there is no oxygen loss between the alveoli  
114 and the end-capillaries (no incomplete capillary diffusion, VS<sub>diff</sub>=0) and SpO<sub>2</sub> is equal to SaO<sub>2</sub> (24). These  
115 assumptions had the following consequences: the alveolar oxygen partial pressure (pAO<sub>2</sub>) is equal to the partial  
116 pressure of oxygen in the end capillaries, the alveolar oxygen saturation is equal to the end capillaries oxygen  
117 saturation, and the oxygen content in the alveoli is the same as the in the end capillaries. For the parameters cHb  
118 and RQ, we extracted the healthy values at two altitudes (0 m and 4600 m a.s.l.) from the literature (31, 32, 43)  
119 and linearly interpolated the parameters between these two altitudes. A linear interpolation was chosen because  
120 a sensitivity analysis revealed only small changes upon variation of these parameters (see appendix). For high  
121 altitudes (i.e. 4600 m a.s.l.), pACO<sub>2</sub> was derived from an interpolation of values reported by Rahn and Otis (35), as  
122 well as de Meer (32) because the literature presented less coherent values; while for sea level, direct values from

123 Marcdante (30) and West (43) were used. With this information, the oxygen cascade enabled us to estimate the  
124 expected SpO<sub>2</sub> range at a specific altitude. Furthermore, we incorporated the technical tolerances that accounted  
125 for the accuracy of pulse oximeters (i.e. ± 2%) determined according to device standards (21) into the model, as  
126 shown in Karlen et al. (24). The pulse oximeter accuracy is an important component that is frequently neglected  
127 by health practitioners, but influences the pulse oximeter readings and therefore diagnostic results. We include  
128 this uncertainty in our model as we strive to better describe the physiology of lung function at different altitudes.  
129 Therefore, in the following, when we mention the “healthy ranges”, we refer to the physiological ranges obtained  
130 by modelling SpO<sub>2</sub> based on minimum and maximum literature values of the physiological parameters, combined  
131 with the pulse oximeter inaccuracies.

### 132 **Altitude-adaptive abnormal SpO<sub>2</sub> threshold**

133 Analogously, we derive an altitude-dependent threshold for abnormal SpO<sub>2</sub> by setting model parameters to  
134 hypoxemia levels. Hypoxemia is defined as a reduced arterial partial pressure of oxygen (paO<sub>2</sub>), which results in a  
135 decrease of SpO<sub>2</sub> and increase of VS (43). At sea level, as reported in literature, we consider a patient to have  
136 hypoxemia if the paO<sub>2</sub> level is below 80 mmHg (3, 26) and therefore SpO<sub>2</sub> decreases below 95%. Additionally, we  
137 assumed that VS<sub>perf</sub> increases to above 5% patients (31). From these assumptions, we recursively derived a disease  
138 related increase of VS<sub>diff</sub> of 19% at sea level. For higher altitudes, we were unable to retrieve any data from the  
139 literature that would describe changes (increase or decrease) in VS (VS<sub>diff</sub> or VS<sub>perf</sub>) or a numerical value for paO<sub>2</sub>  
140 or pAO<sub>2</sub> under hypoxemia. Therefore, we assumed that the VS components remain constant across altitudes, and  
141 the values for cHb, pACO<sub>2</sub>, and RQ are similar in healthy and hypoxemic conditions.

## 142 **MATERIALS AND METHODS**

143 To assess the performance and plausibility of our novel altitude-adaptive SpO<sub>2</sub> model and threshold, we  
144 retrospectively evaluated them against a prospectively collected dataset, a previously published dataset, and  
145 another, statistical model with threshold.

### 146 **Study design and data collection**

147 Our data collection was embedded within a randomised controlled trial by the Swiss-Peruvian Health Research  
148 Platform set in the Cajamarca region in the northern highlands of Peru, located in the provinces of San Marcos and

149 Cajabamba. Our study harnessed the operational and logistical setup of this trial, which assessed the efficacy of an  
150 Integrated Home-environmental Intervention Package (IHIP-2) to improve child respiratory, enteric, and early  
151 development outcomes (19).

152 The trial was approved by the Universidad Peruana Cayetano Heredia ethical review board and the Cajamarca  
153 Regional Health Authority. The trial was registered on the ISRCTN registry (ISRCTN26548981). A total of 317  
154 children aged between 6 and 36 months were enrolled, and informed written consent was obtained from the  
155 children's guardians. A total of 9 field workers (FWs) were trained to visit the children on seven fixed geographical  
156 routes. Children were preassigned to these routes and visited in parallel by FWs to perform a mobile health  
157 assessment once a week over the course of 60 weeks (6 weeks pilot, followed by a 54-week trial from February  
158 2016 to May 2017, excluding 4 weeks of public holidays). FWs had experience from earlier research projects in  
159 collecting basic vital signs and symptoms (17, 18), received five additional days of educational training for the  
160 collection of morbidity data, and underwent one month of practical training before the study started (pilot). FWs  
161 were equipped with a TAB 2 A7-10 tablet (Lenovo Group Ltd, Beijing, CN). The tablet had a custom mHealth app  
162 installed that was developed using the *lambdanative* framework (34). It recorded a photoplethysmogram (PPG)  
163 using an USB connected CE marked iSpO<sub>2</sub> Rx pulse oximeter (Masimo International, Neuchatel, CH) with a multisite  
164 Y-probe, and derived SpO<sub>2</sub> and heart rate (HR). FWs placed the probe on the child's thumb, index finger, or sole of  
165 the foot for the measurement of PPG, HR, and SpO<sub>2</sub>. Simultaneously, respiratory rate was recorded using the RRate  
166 app module (22). In addition, the app acquired location and altitude using the embedded global positioning system  
167 (GPS) sensor. Furthermore, the app metadata regarding the visit and the recordings such as child ID, timestamps,  
168 and child agitation during the vital signs measurements were acquired. All electronically collected data was  
169 uploaded from the app into a digital research database (16). Health seeking behaviour and other relevant  
170 endpoints were reported in a paper-based, validated questionnaire (18), quality checked, and digitised at the end  
171 of the study.

## 172 [Post processing](#)

173 The IHIP-2 vital signs data obtained from the pulse oximeter were post processed to guarantee high data quality.  
174 The PPG, SpO<sub>2</sub>, HR, and perfusion index (PI, indication of signal strength) time series from the main trial period  
175 were imported into Matlab (R2017b, MathWorks Inc., Natick, USA) where a signal quality index (SQI) for the PPG  
176 was calculated (23). We segmented the recordings into segments with SQI > 45. Segments with lower quality (SQI

177  $\leq 45$ ) and with no computed SpO<sub>2</sub> were excluded. Furthermore, entire recordings were excluded if a single segment  
178 duration was shorter than 12 s or the combined length of remaining segments was shorter than 15 s, the range  
179 (5<sup>th</sup> - 95<sup>th</sup> centile) of SpO<sub>2</sub> exceeded 5%, and the HR range surpassed 20 bpm in combination with a low perfusion  
180 (mean PI  $\leq 0.8$ ). We also excluded SpO<sub>2</sub> values below 60% as they are rare and typically associated with severe  
181 clinical cyanosis (46), which was clearly absent in the IHIP-2 cohort. These values also fall in a range where the  
182 performance of the pulse oximeters used were not specified by the manufacturer (70% to 100%). Additionally, as  
183 each child was always scheduled to be measured weekly at the same altitude (i.e. at home), we verified the  
184 consistency of the altitude provided by the GPS. We excluded recordings that contained no altitude information,  
185 and altitude outliers that were more than three scaled median absolute deviations away from the median altitude  
186 of each child. Altitude outliers could have occurred because at home measurements were not always possible, and  
187 because GPS altitude estimates were dependent on weather, the number of available satellites, and other factors.  
188 Finally, we excluded measurements which were recorded following a healthcare center visit or the presence of  
189 cardio-respiratory or diarrheal disease symptoms in the week preceding the recording. For each remaining high  
190 quality recording, we reported the median SpO<sub>2</sub> over the combined segments of a measurement and the median  
191 altitude per child, which was then used for the analysis.

## 192 Evaluation

### 193 Model

194 To compare our model with the available datasets, we visualised the altitude dependence of SpO<sub>2</sub>. We applied a  
195 locally weighted scatterplot smoothing (lowess) function (5) to all SpO<sub>2</sub>-altitude data pairs collected during the  
196 IHIP-2 trial. We limited the comparison to the range of available data (2000–4000 m a.s.l.) to avoid extrapolation  
197 errors. Instead of the LMS method used by Rojas-Camayo et al. (36), we reported the centiles of their data with a  
198 lowess smoother to ensure equivalent processing of both datasets. Furthermore, we computed the deviations  
199 from interpolated medians of both empirical data sets to the model median for each altitude expressed as percent  
200 of the respective model value and reported the mean, minimum and maximum deviations. Additionally, we  
201 calculated the absolute range of SpO<sub>2</sub> values at each altitude for both the model and the empirical data sets and  
202 reported mean, minimum and maximum range.

### 203 Threshold

204 To visualise the differences between the hypoxemia/abnormal SpO<sub>2</sub> thresholds and oxygen administration  
205 guidelines that have been proposed, we graphically compared the altitude-adaptive abnormal SpO<sub>2</sub> threshold, the



206 statistical hypoxemia threshold, and the WHO guideline for oxygen administration (90%) with the 2.5<sup>th</sup> centile  
207 (lowest smoothed) data of children 1 to 5 years old reported by Rojas-Camayo et al. (36). We further computed  
208 the number of measurements in the healthy IHIP-2 data that would have been wrongly classified as abnormal  
209 (false positives) when using either the altitude-adaptive abnormal SpO<sub>2</sub> threshold or the statistical hypoxemia  
210 threshold. The false positives are children that are healthy, but likely would receive additional medical attention  
211 due to the low SpO<sub>2</sub> reading.

## 212 RESULTS

213 We obtained an altitude-adaptive computer model to describe the expected SpO<sub>2</sub> range in healthy children at  
214 higher altitudes, and based on this model proposed a threshold for an abnormal range that could indicate  
215 hypoxemia. The parameters used in the mathematical description of the model to define healthy and abnormal  
216 ranges are available in Table 1. Out of the 12634 SpO<sub>2</sub> measurements obtained from 310 children over the course  
217 of a year, we retained 5981 measurements from 297 children that were considered complete (contained both GPS  
218 and PPG data), featured good quality PPG data, reasonable SpO<sub>2</sub> (> 60 %) and were recorded when no respiratory  
219 disease symptoms or other health issues were reported (410 recordings). At the study start, the mean age of the  
220 children was 20.5 months (SD 6.2 months, range: 6-36 months). Each child contributed to a mean of 20.1 (SD 9)  
221 repeated measurements. Twenty-one children lived above 3000 m a.s.l. and 8 above 3500 m a.s.l. (Table 2).  
222 Therefore, a total of 392 (6.6%) measurements above 3000 m a.s.l. were available.

### 223 Model

224 Our altitude-adaptive model provided a SpO<sub>2</sub> of 97.4% at sea level with a healthy range between 93.5 % and 100%  
225 SpO<sub>2</sub> (Figure 2 and Table 3, high resolution data including model available at (11)). The SpO<sub>2</sub> of the model decreased  
226 with increasing altitude to 89.6% at 4000 m a.s.l. with a healthy SpO<sub>2</sub> range from 82.3% to 94.1%. The 2.5<sup>th</sup> and  
227 97.5<sup>th</sup> centiles reported by Rojas-Camayo et al. largely followed the same trend as those acquired in the IHIP-2  
228 trial, but had a smaller absolute range (Figure 2). Up to 3800 m a.s.l., the 2.5<sup>th</sup> centiles of both empirical data sets  
229 were entirely within the lower boundary of the altitude-adaptive SpO<sub>2</sub> model's proposed healthy range, whereas  
230 at higher altitudes above 3800 m a.s.l., the 2.5<sup>th</sup> centile of the IHIP-2 data slightly fell below this lower boundary.  
231 The upper boundary of the altitude-adaptive SpO<sub>2</sub> model's healthy range followed the IHIP-2 data 97.5<sup>th</sup> centile  
232 closely, while it was slightly exceeded by the 97.5<sup>th</sup> centile data from Rojas-Camayo et al. between 1500 and  
233 3100 m a.s.l. by up 0.5 %. In particular, the model showed absolute ranges very similar to both empirical lowest

234 filtered data sets (model: mean absolute SpO<sub>2</sub> range: 8.66%, min: 6.42%, max: 11.78%; IHIP-2: mean absolute SpO<sub>2</sub>  
235 range: 8.75%, min: 6.75%, max: 11.22%; Rojas-Camayo: mean absolute SpO<sub>2</sub> range: 5.53%, min: 3.43%, max:  
236 8.92%). Furthermore, the model differed very little from the interpolated median of the empirical data sets (IHIP-  
237 2, deviation of model in percent: mean deviation: 1.5%, min: 0.01%, max: 2.29%; Rojas-Camayo: mean deviation:  
238 1.51%, min: 0.02%, max: 1.95%).

### 239 Threshold

240 The altitude-adaptive abnormal SpO<sub>2</sub> threshold followed a similar pattern as the 2.5<sup>th</sup> centile of Rojas-Camayo's  
241 empirical data with 88.8% vs 94% at 2000 m a.s.l. and 80.1% vs 83.8% at 4000 m a.s.l. (Figure 3, see also Table 3).  
242 The 2.5<sup>th</sup> centile threshold explored by Subhi et al. had an SpO<sub>2</sub> of 92.8% at 2000 m a.s.l. and then rapidly diverged  
243 towards much lower SpO<sub>2</sub> values for higher altitudes (75.4% at 4000 m a.s.l.). When comparing the two thresholds  
244 and their performance for our empirical dataset, the altitude-adaptive threshold estimated abnormal SpO<sub>2</sub> in only  
245 17 out of 5981 (0.3%) healthy recordings, whereas the 2.5<sup>th</sup> centile threshold explored by Subhi et al. returned 95  
246 (1.6%) false positives.

## 247 DISCUSSION

248 We proposed an altitude-adaptive model that estimates a healthy SpO<sub>2</sub> range for children living permanently at  
249 altitude and have shown that this proposed healthy SpO<sub>2</sub> range matches empirical data recorded from a pediatric  
250 population living in the Andes. From this model, we derived an altitude-adaptive threshold for abnormal SpO<sub>2</sub>  
251 values. The diagnosis of pneumonia and other respiratory diseases is challenging at altitude, as the most common  
252 diagnostic criteria, such as the respiratory rate and oxygen saturation, are dependent on altitude. Our work  
253 contributes towards making the management of childhood pneumonia, one of the major causes of child mortality  
254 in low resource settings, more objective by attempting to better describe healthy changes of respiratory physiology  
255 found in adapted residents. Equipping health workers with mobile pulse oximeters has become an affordable  
256 solution, is being evaluated at a large scale (29), and has potential for improving pneumonia treatment at a  
257 reasonable cost (12). However, the measurement and interpretation of SpO<sub>2</sub> can be complicated. Computerised  
258 assistance and interpretation of the measurements could ensure reliability of these measurements and provide a  
259 meaningful decision support tool to health workers at the central and peripheral level. The proposed adaptive,  
260 physiology-based model could provide a basis for the necessary computations because it provides a reference for  
261 healthy values at higher altitudes.

262 Our model is unique as the adjustment of the parameters can be tuned individually, based either on measurements  
263 or on known parameter ranges, and it is based on physiology. It was developed considering, where available,  
264 literature-based physiological parameter values of Peruvian Andes residents that are adapted to this environment.  
265 These parameters could be adjusted without altering the underlying model for other populations with known  
266 differences in genetic or physiological adaptation mechanisms (e.g. Himalayan residents) (1).

267 In contrast to our parameterized model, Subhi and colleagues fitted empirical data collected from across the world  
268 into a statistical model describing the SpO<sub>2</sub> distribution using centiles (40). The statistical model was built using  
269 aggregated data collected from mixed populations using pulse oximeters with partially unknown specifications.  
270 The statistical model therefore cannot be adjusted to factors such as population-specific variations or varying  
271 technical specifications (e.g. differing accuracy of pulse oximeter brands or types). In relation to the two empirical  
272 data sets mentioned in this publication, and in comparison to our proposed abnormal SpO<sub>2</sub> threshold, the  
273 statistical threshold provided a very sensitive cut-off at lower altitudes (up to 3300 m a.s.l.). However, it  
274 underestimates potentially abnormal SpO<sub>2</sub> values at higher altitudes. Most likely, this underestimation of the  
275 abnormal SpO<sub>2</sub> values at higher altitudes is due to less data samples being available for the statistical modeling.  
276 Our physiological model was not affected by data sparsity, which is a distinctive feature and clear advantage at  
277 higher altitudes. Both model thresholds, and the studied data sets, supported the current WHO constant threshold  
278 of 90% SpO<sub>2</sub> for oxygen administration at altitudes below 1500 m a.s.l.

279 The altitude-adaptive model described the SpO<sub>2</sub> ranges observed from the empirical data sets with highly similar  
280 mean absolute ranges., However, the two empirical datasets presented in this work originate solely from the  
281 Peruvian Andes and a single type of pulse oximeter. To further validate the model, it will be crucial to apply data  
282 from other regions and ethnicities, and establish if a customised model is required when used in different parts of  
283 the world. Such data collection should be accompanied by a gold standard, such as blood gas measurements with  
284 information on cHb, SaO<sub>2</sub>, paO<sub>2</sub> and paCO<sub>2</sub>, in order to pinpoint the exact sources of potentially observed  
285 differences.

286 At higher altitudes above 3800 m a.s.l., we notice higher deviations in the model compared to what is seen in the  
287 empirical data due to a slower decline of SpO<sub>2</sub> in the model. We suspect that this is directly linked to the  
288 assumptions we made during the modelling of healthy ranges. We assumed that cHb and RQ change linearly with  
289 altitude. However, the adaptation process is likely more pronounced at higher altitudes (6) and might contribute  
290 to non-linear parameter changes.

291 Our assumptions to define the abnormal physiological parameters could limit the validity of the abnormal  
292 threshold. We only based our assumptions on literature values that referred to sea level patients. Due to the  
293 underlying changes in physiology caused by adaptation, disease manifestation and progression, symptoms could  
294 be different at high altitudes compared to at sea level. Furthermore, it is unclear if comorbidities that have not  
295 been captured in the present modelling, such as malnutrition, iron deficiency, or diarrheal diseases that are known  
296 to negatively influence outcomes of patients with pneumonia (4, 37, 39), would also influence the model  
297 parameters. Additional empirical data of sick children are needed to establish models that describe the  
298 dependence of these parameters to altitude. For example, anaemic children display altered ranges for blood gas  
299 parameters and their actual health status is not entirely captured through our cardio-respiratory model based on  
300 SpO<sub>2</sub> measurements. SpO<sub>2</sub> and derived hypoxemia estimations reflect only the proportion of O<sub>2</sub> that is bound to  
301 Hb and not the total O<sub>2</sub> carrying capacity and concentration. Consequently, pulse oximeter assessments are blind  
302 to the effective O<sub>2</sub> available in the tissues. Also, cardiac output, an alternative path to modulate O<sub>2</sub> delivery (14),  
303 is not easily obtainable with pulse oximetry alone. Thus, clinicians need to take the overall clinical situation of the  
304 child into consideration and evaluate treatment options accordingly when interpreting hypoxemia thresholds (10).

305 To assess the performance of the model, we limited the comparison to altitudes from 2000 to 4000 m a.s.l. where  
306 corresponding empirical data was available. The data contained weekly measurements for each child repeated  
307 over a full year (mean: 20.1, SD: 9), therefore representing the expected measurement and physiological variability  
308 within a healthy subject. Among the children recruited from the Cajamarca region during the IHIP-2 trial, only 21  
309 lived above 3000 m a.s.l. which increases the variability in the data. Nevertheless, we observed very similar SpO<sub>2</sub>  
310 ranges from Rojas-Camayo et al. (36). Despite the high numbers of repeated measurements and rigid  
311 measurement protocols, both datasets showed a high variability in the measured SpO<sub>2</sub>. For example, in the IHIP-2  
312 dataset, at 2000 m a.s.l. a healthy range corresponded to 11% (Table 2). Our model represented this large range  
313 of possible healthy values accurately. Nevertheless, the inter- and intra-individual variability could originate from  
314 a number of sources not incorporated in the model. Circadian variation in pediatric SpO<sub>2</sub> has been reported (42)  
315 and we did not account for such daytime differences. Furthermore, there are known sex differences in adults (1),  
316 which could also apply to the pediatric population. Although we used the most recent pulse oximeter technology  
317 and performed continuous measurements for at least a minute with a rigorous approach to PPG post-processing  
318 for high quality, not all the sources for measurement errors in pulse oximetry, such as poor perfusion, inaccurate  
319 probe positioning, or ambient light interference (13), could be fully excluded in this dataset.

320 Additionally, it is important to note that neonates were not considered in the modeling process. Neonatal blood is  
321 known to benefit from the high affinity of fetal haemoglobin and would have changed the oxygen dissociation  
322 curve considerably (33). Since hyperoxia in neonates leads to oxidative stress with potentially severe health  
323 complications (15), the definition of an abnormal threshold and consequently the guideline for oxygen  
324 administration would require a more detailed, separate discussion for this population.

325 We established an altitude-adaptive abnormal SpO<sub>2</sub> threshold based on physiologically plausible values. Our  
326 results show that using such a threshold is most relevant at altitudes above 2000 m a.s.l. The 90% SpO<sub>2</sub> threshold  
327 recommended by the WHO for oxygen administration in patients living at sea level clearly does not apply to these  
328 altitudes. Compared to the previously published statistical altitude-dependent threshold by Subhi et al. (40), our  
329 threshold leads to fewer detections of false positives (healthy children falsely categorized as hypoxemic).  
330 Conversely, while Subhi et al. also promoted the use of an altitude-dependent threshold at higher altitudes  
331 (2500 m a.s.l.), their threshold is very conservative at altitudes below 2950 m a.s.l. but more lenient at higher  
332 altitudes, where it decreases very steeply which might exclude a number of patients in need of supplemental  
333 oxygen.

### 334 Outlook

335 Thus far, experts have not agreed on a definition for abnormal SpO<sub>2</sub> thresholds at altitudes higher than sea level.  
336 To date, no reliable SpO<sub>2</sub> data from children suffering from hypoxemia and ALRI at altitude are available. The  
337 advancement of research for developing better tools to diagnose pneumonia and ALRI at altitude would greatly  
338 benefit from access to publicly available, comprehensive data sets obtained from sick children.

339 With pulse oximeters increasingly being used as monitors for ALRI diagnosis and treatment, additional research is  
340 urgently needed to provide a reliable description of the SpO<sub>2</sub> distribution at altitude, and to develop guidelines of  
341 oxygen administration for hypoxemic children living in these settings.

342 Furthermore, knowledge of abnormal SpO<sub>2</sub> values at high altitudes could help in the development of new decision  
343 support tools for health workers operating in low resource settings with the goal to improve clinical management  
344 of hypoxemia in children with ALRI in the future.

## 345 CONCLUSION

346 Improvement of SpO<sub>2</sub>-altitude models present a first step towards an integration of pulse oximetry in low resource  
347 settings and could further the development of valid altitude-dependent thresholds for treatment of childhood  
348 pneumonia and other ALRI. We developed an altitude-adaptive physiology-backed SpO<sub>2</sub> model using an existing  
349 physiological model using the concept of VS adjusted for published ranges of values for pACO<sub>2</sub>, cHb, and RQ. Based  
350 on this model, healthy ranges and an altitude-dependent abnormal SpO<sub>2</sub> threshold are suggested that are based  
351 on physiological variations of vital parameters. With the increased availability of sensors and digitalised systems in  
352 low resource settings, parametrised models could provide additional valuable support to primary health workers  
353 to understand the patient's condition at the point of care, and choosing treatment options based on objectively  
354 obtained physiological measurements.

## 355 ACKNOWLEDGMENTS

356 We are grateful to all staff and students from the Swiss – Peruvian Health Research Platform and the San Marcos  
357 research station, especially Angelica Fernandez and Maria Luisa Huyalinos, Hector Verastegui and Nestor Nuño for  
358 their assistance and support throughout the study. The San Marcos Red Salud-IV health personnel supported the  
359 SpO<sub>2</sub> measurement in the peripheral health posts. Matthias Hüser programmed the assessment app and  
360 maintained the software throughout the study. We would like to thank all the families that participated in the  
361 randomised trial. We thank Dr. Jose Rojas-Camayo for sharing the centiles of his valuable dataset, Ms Janine Burren  
362 for her valuable input on statistics and data representation, and Dr. Urs Frey and Joanne Lim for helpful comments  
363 on this manuscript. We appreciate the various contributions of the colleagues from the Swiss Pediatric Surveillance  
364 Unit (SPSU) network. Furthermore, Masimo International kindly facilitated the access to their pulse oximeter  
365 sensors in Peru.

## 366 COMPETING INTERESTS

367 The authors declare no competing interests.

368 **FUNDING**

369 The presented research was supported through ETH Global seed funding, the Swiss National Science Foundation  
370 (150640), and the UBS Optimus Foundation.

371 **REFERENCES**

- 372 1. **Beall CM.** Two routes to functional adaptation: Tibetan and Andean high-altitude natives. *Proc Natl Acad*  
373 *Sci* 104: 8655–60, 2007.
- 374 2. **Benatar SR, Hewlett AM, Nunn JF.** The use of ISO-shunt lines for control of oxygen therapy. *Brit J*  
375 *Anaesth* 45: 711–8, 1973.
- 376 3. **Bradley JS, Byington CL, Shah SS, Alverson B, Carter ER, Harrison C, Kaplan SL, MacE SE, McCracken GH,**  
377 **Moore MR, St Peter SD, Stockwell JA, Swanson JT.** The management of community-acquired pneumonia  
378 in infants and children older than 3 months of age: Clinical practice guidelines by the pediatric infectious  
379 diseases society and the infectious diseases society of America. *Clin Infect Dis* 53: 25–76, 2011.
- 380 4. **Chisti MJ, Graham SM, Duke T, Ahmed T, Faruque ASG, Ashraf H, Bardhan PK, Shahid ASMSB, Shahunja**  
381 **KM, Salam MA.** Post-discharge mortality in children with severe malnutrition and pneumonia in  
382 Bangladesh. *PLoS One* 9: 1–7, 2014.
- 383 5. **Cleveland WS, Devlin SJ.** Locally Weighted Regression : An Approach to Regression Analysis by Local  
384 Fitting. *J Am Stat Assoc* 1459: 37–41, 1988.
- 385 6. **Cohen JH, Haas JD.** Hemoglobin correction factors for estimating the prevalence of iron deficiency  
386 anemia in pregnant women residing at high altitudes in Bolivia. *Rev Panam Salud Pública/Pan Am J Public*  
387 *Heal* 6: 392–9, 1999.
- 388 7. **Duke T, Subhi R, Peel D, Frey B.** Pulse oximetry: technology to reduce child mortality in developing  
389 countries. *Ann Trop Paediatr* 29: 165–75, 2009.
- 390 8. **Duke T, Wandt F, Jonathan M, Matai S, Kaupa M, Saavu M, Subhi R, Peel D.** Improved oxygen systems  
391 for childhood pneumonia: a multihospital effectiveness study in Papua New Guinea. *Lancet* 372: 1328–  
392 33, 2008.
- 393 9. **Ellis RK.** Determination of PO<sub>2</sub> from saturation. *J Appl Physiol* 67: 902, 1989.
- 394 10. **Enoch AJ, English M, Shepperd S.** Does pulse oximeter use impact health outcomes? A systematic  
395 review. *Arch Dis Child* 101: 694–700, 2016.
- 396 11. **ETH Zurich Research Collection.** Altitude-adaptive model for pediatric oxygen saturation. (2019). doi:  
397 10.3929/ethz-b-000344084.



- 398 12. **Floyd J, Wu L, Hay Burgess D, Izadnegahdar R, Mukanga D, Ghani AC.** Evaluating the impact of pulse  
399 oximetry on childhood pneumonia mortality in resource-poor settings. *Nature* 528: S53-9, 2015.
- 400 13. **Fouzas S, Priftis KN, Anthracopoulos MB.** Pulse Oximetry in Pediatric Practice. *Pediatrics* 128: 740–52,  
401 2011.
- 402 14. **Gutierrez JA, Theodorou AA.** Oxygen Delivery and Oxygen Consumption in Pediatric Critical Care. In:  
403 *Pediatric Critical Care Study Guide*, edited by Lucking SE, Maffei FA, Tamburro RF, Thomas NJ. Springer, p.  
404 19–38.
- 405 15. **Habre W, Peták F.** Perioperative use of oxygen: Variabilities across age. *Br J Anaesth* 113: ii26-36, 2014.
- 406 16. **Harris PA, Taylor R, Thielke R, Payne J, Gonzalez N, Conde JG.** Research electronic data capture (REDCap)  
407 - a metadata-driven methodology and workflow process for providing translational research informatics  
408 support. *J Biomed Inform* 42: 377–81, 2009.
- 409 17. **Hartinger SM, Lanata CF, Hattendorf J, Gil AI, Verastegui H, Ochoa T, Mäusezahl D.** A community  
410 randomised controlled trial evaluating a home-based environmental intervention package of improved  
411 stoves, solar water disinfection and kitchen sinks in rural Peru: Rationale, trial design and baseline  
412 findings. *Contemp Clin Trials* 32: 864–73, 2011.
- 413 18. **Hartinger SM, Lanata CF, Hattendorf J, Verastegui H, Gil AI, Wolf J, Mäusezahl D.** Improving household  
414 air, drinking water and hygiene in rural Peru: A community-randomized-controlled trial of an integrated  
415 environmental home-based intervention package to improve child health. *Int J Epidemiol* 45: 2089–99,  
416 2016.
- 417 19. **Hartinger SM, Nuno N, Hattendorf J, Verastegui H, Ortiz M, Mäusezahl D, Nuño N, Verastegui H, Ortiz  
418 M, Mäusezahl D.** A factorial randomised controlled trial to combine early child development and  
419 environmental interventions to reduce the negative effects of poverty on child health and development:  
420 rationale, trial design and baseline findings. *BioRxiv* (2018). doi: 10.1101/465856.
- 421 20. **Hudson J, Nguku SM, Sleiman J, Karlen W, Dumont GA, Petersen CL, Warriner CB, Ansermino JM.**  
422 Usability testing of a prototype phone Oximeter with healthcare providers in high- and low-medical  
423 resource environments. *Anaesthesia* 67: 957–67, 2012.
- 424 21. **International Standard Organisation.** *ISO 80601-2-61 Medical electrical equipment — Part 2-61:*  
425 *Particular requirements for basic safety and essential performance of pulse oximeter equipment.* Geneva:

- 426 2011.
- 427 22. **Karlen W, Gan H, Chiu M, Dunsmuir D, Zhou G, Dumont GA, Ansermino JM.** Improving the accuracy and  
428 efficiency of respiratory rate measurements in children using mobile devices. *PLoS One* 9: e99266, 2014.
- 429 23. **Karlen W, Kobayashi K, Ansermino JM, Dumont GA.** Photoplethysmogram signal quality estimation  
430 using repeated Gaussian filters and cross-correlation. *Physiol Meas* 33: 1617–29, 2012.
- 431 24. **Karlen W, Petersen CL, Dumont GA, Ansermino JM.** Variability in estimating shunt from single pulse  
432 oximetry measurements. *Physiol Meas* 36: 967–81, 2015.
- 433 25. **Karlen W, Petersen CL, Dumont GA, Mark Ansermino J.** Corrigendum: Variability in estimating shunt  
434 from single pulse oximetry measurements. *Physiol Meas* 38: 1746–7, 2017.
- 435 26. **Kasper D, Fauci AS, Hauser SL, Longo DL, Jameson JL, Loscalzo J,** editors. *Harrison's Principles of Internal*  
436 *Medicine*. 19th ed. New York, USA: McGraw-Hill Education, 2015.
- 437 27. **Luks A, Swenson E.** Pulse oximetry at high altitude. *High Alt Med Biol* 12: 109–19, 2011.
- 438 28. **Madden K, Khemani RG, Newth CJL, Argent AC, Hatherill M, Newth CJ, Klein M, Barker SJ, Tremper KK,**  
439 **Barker SJ, Tremper KK, Hyatt J, Corkey CW, Barker GA, Edmonds JF, Al. E, Frey B, Butt W, Gagnon S,**  
440 **Jodoin A, Martin R, Hammer J, Newth CJ, Hammer J, Eber E, Hedstrand U, Hoover CF, Kim YJ, Lenke LG,**  
441 **Bridwell KH, Al. E, Lenke LG, Bridwell KH, Blanke K, Baldus C, Maniscalco M, Zedda A, Faraone S, Al. E,**  
442 **Mithoefer JC, Bossman OG, Thibeault DW, Mead GD, Newth CJL, Hammer J, Nichols MM, Nichols DG,**  
443 **Numa AH, Newth CJ, Perez A, Mulot R, Vardon G, Al. E, Permutt S, Rayner J, Trespalacios F, Machan J,**  
444 **Al. E, Sivan Y, Deakers TW, Newth CJ, Sivan Y, Eldadah MK, Cheah TE, Newth CJ, Stalcup SA, Mellins RB,**  
445 **Steele DW, Santucci KA, Wright RO, Al. E, Tobias JD, Flanagan JF, Wheeler TJ, Al. E, West JB, Zhang JG,**  
446 **Wang W, Qiu GX, Al. E.** Paediatric applied respiratory physiology – the essentials. *Paediatr Child Health*  
447 (*Oxford*) 19: 249–56, 2009.
- 448 29. **Malaria Consortium.** The Pneumonia Diagnostics Project: evaluating devices for accuracy [Online]. 2016.  
449 [https://www.malariaconsortium.org/resources/publications/739/The-Pneumonia-Diagnostics-Project:-](https://www.malariaconsortium.org/resources/publications/739/The-Pneumonia-Diagnostics-Project:-evaluating-devices-for-accuracy-)  
450 [evaluating-devices-for-accuracy-](https://www.malariaconsortium.org/resources/publications/739/The-Pneumonia-Diagnostics-Project:-evaluating-devices-for-accuracy-) [5 Jun. 2019].
- 451 30. **Marcdante KJ, Kliegman RM,** editors. *NELSON Essentials of Pediatrics*. 7th ed. Philadelphia, USA: Elsevier  
452 Saunders, 2015.
- 453 31. **Marino PL,** editor. *The ICU Book*. 4th ed. Philadelphia, USA: Lippincott Williams & Wilkins, 2013.

- 454 32. **de Meer K, Heymans HSA, Zijlstra WG.** Physical adaptation of children to life at high altitude. *Eur J*  
455 *Pediatr* 154: 263–272, 1995.
- 456 33. **Nelson NM, Prodhom LS, Cherry RB, Smith CA.** A Further Extension of the in Vivo Oxygen-Dissociation  
457 Curve for the Blood of the Newborn Infant. *J Clin Invest* 43: 606–10, 1964.
- 458 34. **Petersen CL, Gorges M, Dunsmuir D, Ansermino M, Dumont GA.** Experience report: Functional  
459 Programming of mHealth Applications. In: *Proc. of the 18th ACM SIGPLAN int conference on Functional*  
460 *programming*. ACM Press, p. 357–62.
- 461 35. **Rahn H, Otis AB.** Man's respiratory response during and after acclimatization to high altitude. *Am J*  
462 *Physiol* 157: 445–62, 1949.
- 463 36. **Rojas-Camayo J, Mejia CR, Callacondo D, Dawson JA, Posso M, Galvan CA, Davila-Arango N, Bravo EA,**  
464 **Loescher VY, Padilla-Deza MM, Rojas-Valero N, Velasquez-Chavez G, Clemente J, Alva-Lozada G,**  
465 **Quispe-Mauricio A, Bardalez S, Subhi R.** Reference values for oxygen saturation from sea level to the  
466 highest human habitation in the Andes in acclimatised persons. *Thorax* 87: 1–4, 2017.
- 467 37. **Schlaudecker EP, Steinhoff MC, Moore SR.** Interactions of diarrhea, pneumonia, and malnutrition in  
468 childhood. *Curr Opin Infect Dis* 24: 496–502, 2011.
- 469 38. **Severinghaus JW.** Simple, accurate equations for human blood O<sub>2</sub> dissociation computations. *J Appl*  
470 *Physiol* 46: 599–602, 1979.
- 471 39. **Singh V, Aneja S.** Pneumonia - management in the developing world. *Paediatr Respir Rev* 12: 52–9, 2011.
- 472 40. **Subhi R, Smith K, Duke T.** When should oxygen be given to children at high altitude? A systematic review  
473 to define altitude-specific hypoxaemia. *Arch Dis Child* 94: 6–10, 2009.
- 474 41. **United Nations Children's Fund (UNICEF).** *Pneumonia and diarrhoea: Tackling the deadliest diseases for*  
475 *the world's poorest children*. New York, USA: United Nations Children's Fund (UNICEF), 2012.
- 476 42. **Vargas MH, Heyaime-Lalane J, Pérez-Rodríguez L, Zúñiga-Vázquez G, Furuya MEY.** Day-night fluctuation  
477 of pulse oximetry: An exploratory study in pediatric inpatients. *Rev Investig Clin* 60: 303–10, 2008.
- 478 43. **West JB.** *Respiratory Physiology: the essential*. 9th ed. Baltimore, USA: Lippincott Williams & Wilkins,  
479 2012.
- 480 44. **World Health Organization.** *Pocket book of hospital care for children: Second edition Guidelines for the*

- 481            *management of common childhood illnesses*. 2nd ed. Geneva, CH: World Health Organization, 2013.
- 482    45.    **World Health Organization, The United Nations Children’s Fund (UNICEF)**. *Ending preventable child*
- 483            *deaths from pneumonia and diarrhoea by 2025: The integrated Global Action Plan for Pneumonia and*
- 484            *Diarrhoea (GAPD)*. Geneva, CH: World Health Organization/The United Nations Children’s Fund
- 485            (UNICEF), 2013.
- 486    46.    **Yadav A**, editor. Monitoring in Anesthesia. In: *Short Textbook of Anesthesia*. 2018, p. 61.
- 487

488 **TABLES**

489 *Table 1: Physiological parameters obtained from the literature used to implement the altitude-adaptive SpO<sub>2</sub> model. The healthy*  
 490 *ranges (min, max and mean) describe known and expected values in a healthy subject. Parameters that are expected to change*  
 491 *under hypoxemic conditions are reported in the last column. We do not differentiate between adults and children. \*same value*  
 492 *range (min – max) assumed as at sea level. pACO<sub>2</sub>: alveolar partial pressure of carbon dioxide, RQ: respiratory quotient, cHb:*  
 493 *haemoglobin concentration, VS<sub>perf</sub>: perfusion defect, VS<sub>diff</sub>: diffusion defect, pAO<sub>2</sub>: alveolar partial pressure of oxygen, FiO<sub>2</sub>:*  
 494 *fraction of inspired O<sub>2</sub>, P<sub>atm</sub>: atmospheric pressure, PH<sub>2</sub>O: vapour pressure of water.*

| Parameter                | Unit     | Ref.         | Healthy ranges                                                                                                                          |             |            |               |             |            | Hypoxemia                            |
|--------------------------|----------|--------------|-----------------------------------------------------------------------------------------------------------------------------------------|-------------|------------|---------------|-------------|------------|--------------------------------------|
|                          |          |              | Sea level                                                                                                                               |             |            | 4500 m a.s.l. |             |            |                                      |
|                          |          |              | <u>min</u>                                                                                                                              | <u>mean</u> | <u>max</u> | <u>min</u>    | <u>mean</u> | <u>max</u> |                                      |
| <i>pACO<sub>2</sub></i>  | mmHg     | (30, 32, 35) | 35                                                                                                                                      | 40          | 45         | 23            | 28.3        | 33         | Assumed to be equal to healthy range |
| <i>RQ</i>                | unitless | (32, 43)     | 0.8                                                                                                                                     | 0.8         | 1          | 1             | 1           | 1          |                                      |
| <i>cHb</i>               | g/100 ml | (43)         | 12                                                                                                                                      | 15          | 17.5       | 17            | 20          | 22.5       |                                      |
| <i>VS<sub>perf</sub></i> | %        | (31)         | 0                                                                                                                                       | 2           | 5          | 0             | 2           | 5          | ≥ 5*                                 |
| <i>VS<sub>diff</sub></i> | %        | Derived      | 0                                                                                                                                       | 0           | 0          | 0             | 0           | 0          | ≥ 19*                                |
| <i>pAO<sub>2</sub></i>   | mmHg     | Derived      | Derived by the alveolar gas equation, with parameters FiO <sub>2</sub> , P <sub>atm</sub> , PH <sub>2</sub> O, pACO <sub>2</sub> and RQ |             |            |               |             |            |                                      |

495

496

497 *Table 2: IHIP-2 pulse oximeter data: Distribution of children, number of measurements and SpO<sub>2</sub> per altitude. Age range of the*  
 498 *children at study start: 6-36 months (mean: 20.5 months, SD: 6.2 months), 21 children above 3000 m a.s.l. (392 measurements,*  
 499 *6.6 % of total number of measurements), 8 above 3500 m a.s.l. (171 measurements, 2.9 % of total number of measurements),*  
 500 *mean number of measurement per child: 20.1 (SD 9).*

| Altitude<br>(m a.s.l.) | No.<br>children | Age at study<br>start<br>(months) |     | No. of<br>measurements | No. of measurements per<br>child |      |     | SpO <sub>2</sub> (%) |        |       |
|------------------------|-----------------|-----------------------------------|-----|------------------------|----------------------------------|------|-----|----------------------|--------|-------|
|                        |                 | Mean                              | SD  |                        | Min                              | Mean | Max | Min                  | Median | Max   |
| 2000                   | 78              | 21.0                              | 6.0 | 1668                   | 1                                | 21.4 | 39  | 88.9                 | 97.2   | 100.0 |
| 2100                   | 37              | 20.4                              | 6.1 | 803                    | 1                                | 21.7 | 43  | 87.4                 | 97.2   | 100.0 |
| 2200                   | 6               | 15.7                              | 5.0 | 109                    | 7                                | 18.2 | 24  | 88.6                 | 96.6   | 99.7  |
| 2300                   | 15              | 19.5                              | 6.7 | 389                    | 5                                | 25.9 | 34  | 89.2                 | 96.7   | 100.0 |
| 2400                   | 3               | 24.0                              | 2.0 | 77                     | 19                               | 25.7 | 31  | 91.9                 | 96.2   | 100.0 |
| 2500                   | 13              | 20.5                              | 5.7 | 264                    | 4                                | 20.3 | 33  | 87.1                 | 96.0   | 100.0 |
| 2600                   | 22              | 21.6                              | 5.6 | 472                    | 2                                | 21.5 | 39  | 81.1                 | 96.0   | 100.0 |
| 2700                   | 39              | 21.5                              | 6.8 | 753                    | 4                                | 19.3 | 32  | 85.2                 | 95.6   | 100.0 |
| 2800                   | 20              | 21.8                              | 5.7 | 316                    | 1                                | 15.8 | 34  | 83.9                 | 95.2   | 99.5  |
| 2900                   | 18              | 17.7                              | 6.0 | 276                    | 1                                | 15.3 | 27  | 85.6                 | 94.7   | 98.6  |
| 3000                   | 25              | 20.2                              | 7.2 | 462                    | 5                                | 18.5 | 37  | 81.5                 | 94.5   | 100.0 |
| 3100                   | 8               | 20.0                              | 6.5 | 111                    | 1                                | 13.9 | 24  | 80.7                 | 94.4   | 100.0 |
| 3200                   | 3               | 19.3                              | 6.0 | 76                     | 12                               | 25.3 | 38  | 85.7                 | 93.4   | 98.2  |
| 3300                   | 1               | 20.0                              | 0.0 | 19                     | 19                               | 19.0 | 19  | 89.9                 | 92.4   | 95.7  |
| 3400                   | 1               | 17.0                              | 0.0 | 15                     | 15                               | 15.0 | 15  | 86.0                 | 92.9   | 95.4  |
| 3500                   | 0               | -                                 | -   | 0                      | -                                | -    | -   | -                    | -      | -     |
| 3600                   | 5               | 19.4                              | 4.7 | 107                    | 9                                | 21.4 | 30  | 84.3                 | 92.7   | 98.7  |
| 3700                   | 1               | 28.0                              | 0.0 | 24                     | 24                               | 24.0 | 24  | 86.4                 | 92.5   | 95.6  |
| 3800                   | 1               | 23.0                              | 0.0 | 22                     | 22                               | 22.0 | 22  | 80.8                 | 87.8   | 93.9  |
| 3900                   | 1               | 14.0                              | 0.0 | 18                     | 18                               | 18.0 | 18  | 81.6                 | 88.4   | 90.6  |
| <b>total</b>           | 297             | 20.5                              | 6.2 | 5981                   | -                                | 20.1 | -   | -                    | -      | -     |

501

502 *Table 3: Values of the healthy ranges of the altitude-adaptive SpO<sub>2</sub> model including its median and the abnormal SpO<sub>2</sub>*  
 503 *threshold, per altitude. More granular altitude steps available in (11).*

| Altitude (m a.s.l.) | Upper healthy range (% SpO <sub>2</sub> ) | Lower healthy range (% SpO <sub>2</sub> ) | Model Mean (% SpO <sub>2</sub> ) | Threshold (% SpO <sub>2</sub> ) |
|---------------------|-------------------------------------------|-------------------------------------------|----------------------------------|---------------------------------|
| 0                   | 100.0                                     | 93.6                                      | 97.4                             | 92.9                            |
| 500                 | 100.0                                     | 93.0                                      | 97.0                             | 92.2                            |
| 1000                | 99.6                                      | 92.2                                      | 96.4                             | 91.2                            |
| 1500                | 99.1                                      | 91.3                                      | 95.8                             | 90.1                            |
| 2000                | 98.5                                      | 90.1                                      | 95.0                             | 88.8                            |
| 2500                | 97.7                                      | 88.7                                      | 94.0                             | 87.1                            |
| 3000                | 96.7                                      | 87.0                                      | 92.8                             | 85.2                            |
| 3500                | 95.6                                      | 84.9                                      | 91.4                             | 82.9                            |
| 4000                | 94.1                                      | 82.3                                      | 89.6                             | 80.1                            |

504

## 505 FIGURES

506 *Figure 1: Oxygen cascade describing the loss in oxygen partial pressure (pO<sub>2</sub>) between inspired air and peripheral blood*  
 507 *measured with a pulse oximeter. The lines illustrate the standard situation for a healthy subject at sea level (continuous) and*  
 508 *at 4500 m a.s.l. (dashed). Virtual shunt describes the combined loss in oxygen content due to incomplete diffusion or perfusion*  
 509 *between alveolar and arterial compartments. Adapted from (24, 43).*

510

511 *Figure 2: The proposed altitude-adaptive SpO<sub>2</sub> model provides a healthy SpO<sub>2</sub> range (light grey area). The black dotted line*  
 512 *indicates the median SpO<sub>2</sub> estimated by the model. The parameters for the min, max and mean model parameters are given in*  
 513 *Table 1. The 2.5<sup>th</sup>-97.5<sup>th</sup> centiles of the SpO<sub>2</sub> data from Rojas-Camayo et al. (light grey dashed lines) (36) and the Integrated*  
 514 *Home-environmental Intervention Package (IHIP-2) data set (black dashed-dotted lines) that were both recorded in the Peruvian*  
 515 *Andes mostly fall into our proposed healthy range. The reported number of measurements per children for the IHIP-2 data can*  
 516 *be found in Table 2.*

517

518 *Figure 3: Comparison of proposed abnormal SpO<sub>2</sub> thresholds that would lead to oxygen administration in patients and existing*  
 519 *guidelines. The altitude-adaptive abnormal SpO<sub>2</sub> threshold (continuous black line) is based on the physiological model derived*  
 520 *in this work where a virtual shunt was applied. The threshold from Subhi et al.(40) is the 2.5<sup>th</sup> centile derived from*  
 521 *observations in healthy children collected in a literature review (dotted light grey line), and the 2.5<sup>th</sup> centile from Rojas-*  
 522 *Camayo et al.(36) is derived from a prospectively collected healthy pediatric sample in the Peruvian Andes (dashed grey line).*  
 523 *The WHO 90% oxygen administration guideline is a result of a working group consensus (starred grey line) (44) that is in use at*  
 524 *lower altitudes.*

525

526 Appendix

527

528 *Table A1: Parameters required for the calculation of the oxygen cascade with specification of dependency on other*  
 529 *parameters and the expected change with increasing altitude.*

| Abbreviation    | Unit             | Name                                                         | Healthy adult value at 0 m a.s.l. | Dependency                             | Expected change with increasing altitude |
|-----------------|------------------|--------------------------------------------------------------|-----------------------------------|----------------------------------------|------------------------------------------|
| $pAO_2$         | mmHg             | Partial pressure of alveolar $O_2$                           |                                   | $FiO_2, P_{atm}, PH_2O, pACO_2$ and RQ | Decrease                                 |
| $Sc'O_2$        | %                | Oxygen saturation of end-capillary blood                     |                                   | $pAO_2$                                | Decrease                                 |
| $Cc'O_2$        | ml/100 ml        | Oxygen content of end-capillary blood                        |                                   | $BO_2, cHb, SAO_2, PAO_2$              | Increase                                 |
| $CaO_2$         | ml/100 ml        | Oxygen content of arterial blood                             |                                   | $BO_2, cHb, SaO_2, PaO_2$              | Increase                                 |
| $PaO_2$         | mmHg             | Partial pressure of arterial $O_2$                           |                                   | $SaO_2$                                | Decrease                                 |
| $SaO_2$         | %                | Oxygen saturation of arterial blood                          |                                   |                                        | Decrease                                 |
| $P_{atm}$       | kPa              | Ambient gas pressure                                         | 101.325                           |                                        | Decrease                                 |
| $FiO_2$         | %                | Fraction of inspired $O_2$                                   | 21                                |                                        | No change                                |
| $pACO_2$        | mmHg             | Partial pressure of alveolar $CO_2$                          | 40                                |                                        | Decrease                                 |
| $VS_{perf}$     | %                | Perfusion component of virtual shunt                         | 2                                 |                                        | No change                                |
| $VS_{diff}$     | %                | Diffusion component of virtual shunt                         | 0                                 |                                        | No change                                |
| RQ              | unitless         | Respiratory exchange ratio ( $O_2$ inspired/ $CO_2$ expired) | 0.8                               |                                        | Increase                                 |
| $cHb$           | g/100 ml         | Haemoglobin concentration in blood                           | 12                                |                                        | Increase                                 |
| $PH_2O$         | mmHg             | Vapour pressure of water                                     | 47                                |                                        | No change                                |
| $BO_2$          | ml $O_2$ /(g Hb) | Oxygen-binding capacity of haemoglobin in blood              | 1.34                              |                                        | No change                                |
| $CaO_2 - CvO_2$ | ml/100 ml        | Arteriovenous oxygen difference ( $CvO_2$ )                  | 5                                 |                                        | No change                                |

530

531



532 **Equations**

533 For the entire computer model of the oxygen cascade, please consult (24, 25). See Table A1 for the  
534 variable names.

535

536

537 *Alveolar gas equation:*

538 
$$pAO_2 = FiO_2 * (P_{atm} - PH_2O) - \frac{pACO_2}{RQ} + pACO_2 * FiO_2 * \frac{1 - RQ}{RQ}$$

539 *Severinghaus equation (38):*

540 
$$SAO_2 = \frac{1}{\frac{23400}{pAO_2^3 + 150 * pAO_2} + 1} * 100$$

541 *O<sub>2</sub> Content equation:*

542 
$$CxO_2 = BO_2 * \frac{cHb * SxO_2}{100} + 0.003 * pxO_2$$

543 *Severinghaus-Ellis equation (9):*

544 
$$PaO_2 = (B + A)^{1/3} - (B - A)^{1/3}$$

545 
$$A = \frac{11700}{\frac{1}{\bar{S}aO_2 - 1}} \quad B = \sqrt{50^3 + A^2}$$

546 *Virtual Shunt from perfusion defect (VS<sub>perf</sub>):*

547 
$$VS_{perf} = \frac{CcO_2 - CaO_2}{CcO_2 - CaO_2 + (CaO_2 - CvO_2)}$$

548

549 *Virtual Shunt from diffusion defect (VS<sub>diff</sub>):*

550 
$$pcO_2 = pAO_2 * (1 - VS_{diff})$$

551

552

553 **Sensitivity analysis**

554 To display the influence of parameters on the output of the oxygen cascade, a sensitivity analysis was  
555 performed (Figure A1). The parameters variation was chosen to reproduce the minimum and maximum  
556 value used in the altitude-adaptive SpO<sub>2</sub> model (Table 1). A change in pACO<sub>2</sub> had the highest effect,  
557 followed by VS<sub>diff</sub>, VS<sub>perf</sub> and RQ. A change in cHb is negligible for the calculation of SpO<sub>2</sub>, however, please  
558 note that it has a significant influence on availability of O<sub>2</sub> in the tissues.

559

560

561 Figure A1: Sensitivity analysis of the five main model parameters respiratory quotient (RQ) (top left), virtual  
562 shunt from diffusion defect (VS<sub>diff</sub>)(top right), virtual shunt from perfusion defect (VS<sub>perf</sub>) (middle left), PACO<sub>2</sub>  
563 (middle right), and cHb (bottom left).

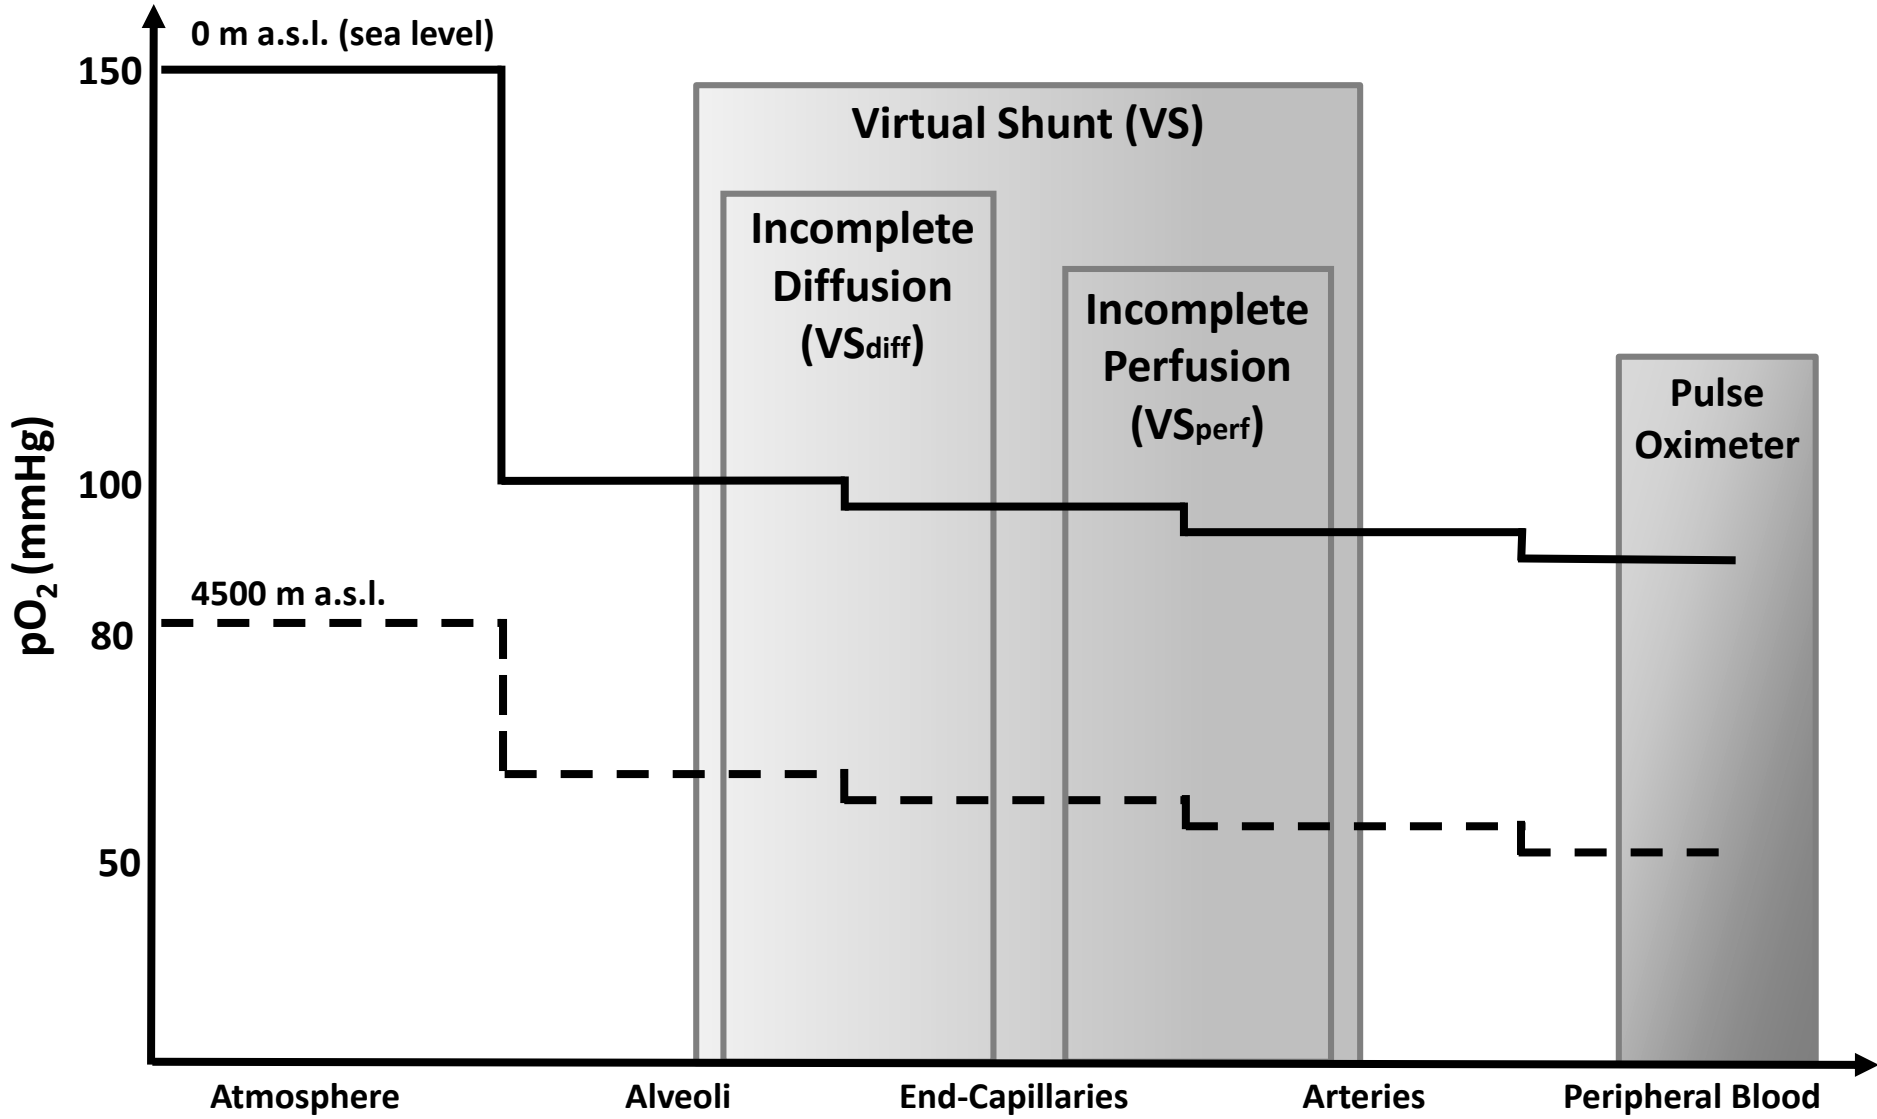

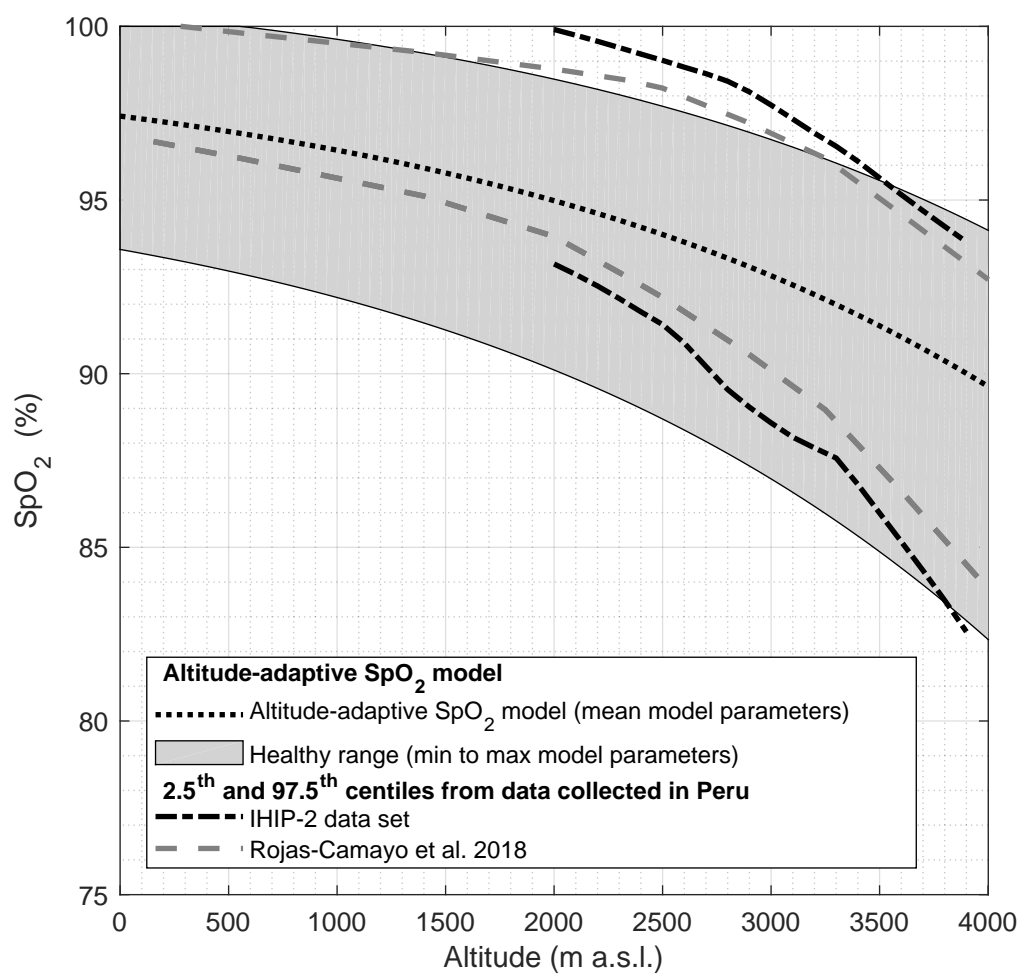

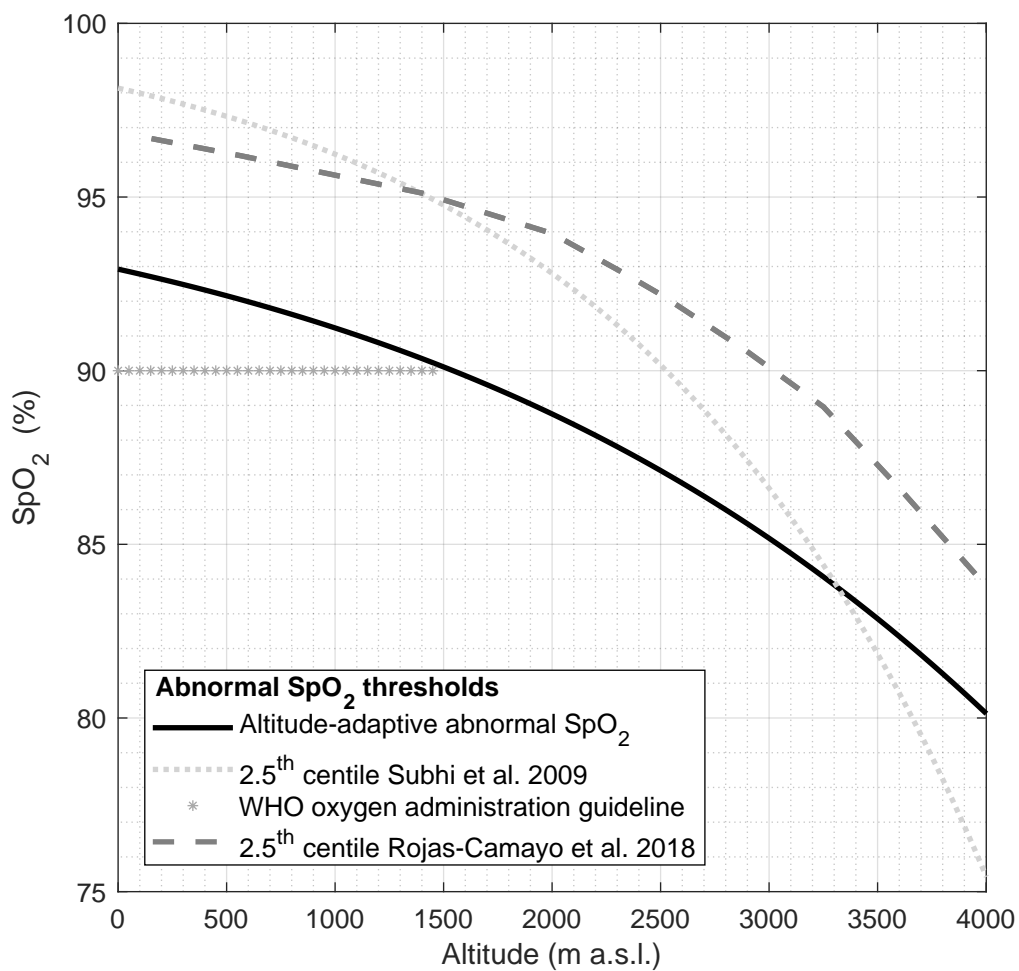

sensitivity RQ (VS<sub>diff</sub>=10%, VS<sub>perf</sub>=5%, pACO<sub>2</sub>=4666.3 mmHg, cHb=17 g/100ml )

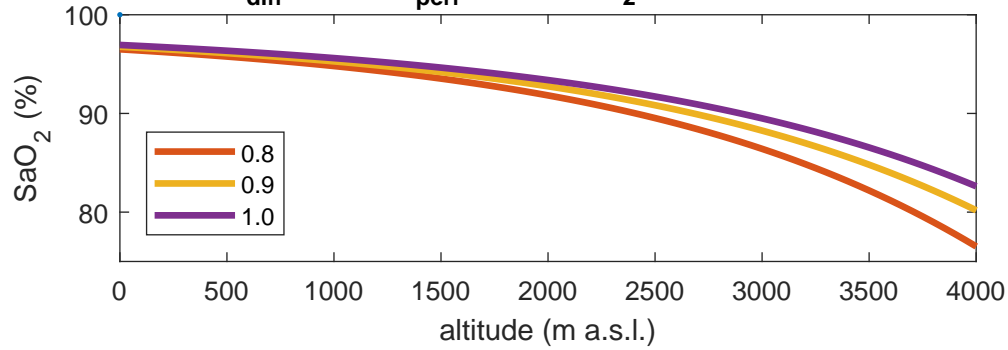

sensitivity VSdiff (RQ=0.9, VS<sub>perf</sub>=5%, pACO<sub>2</sub>=4666.3 mmHg, cHb=17 g/100ml )

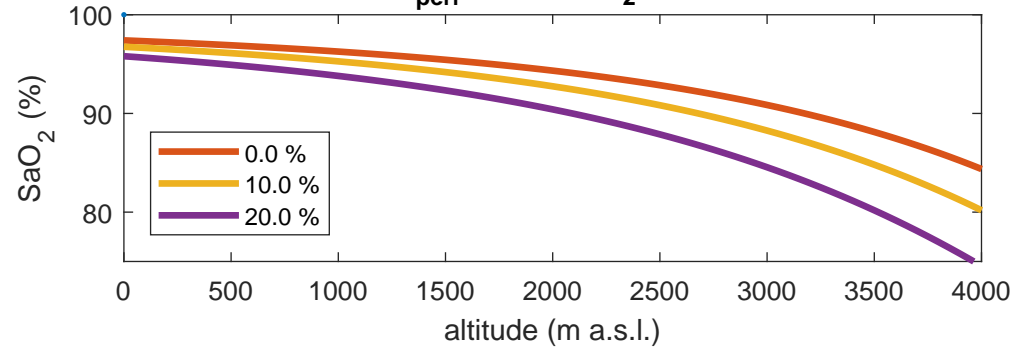

sensitivity VSperf (RQ=0.9, VS<sub>diff</sub>=10%, pACO<sub>2</sub>=4666.3 mmHg, cHb=17 g/100ml )

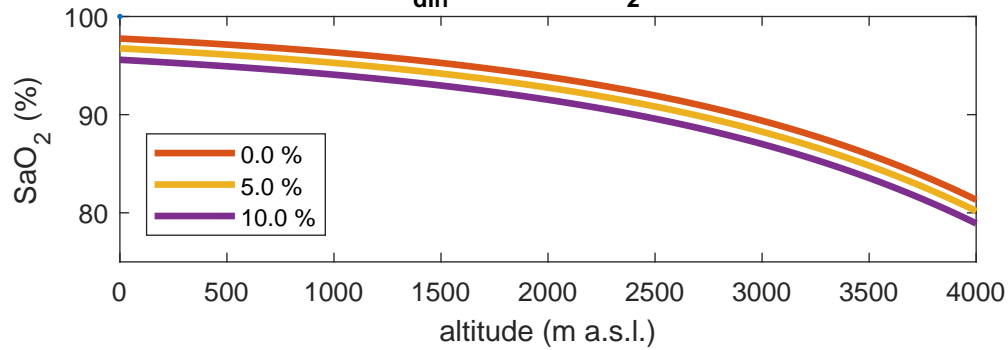

sensitivity pACO2 (RQ=0.9, VS<sub>diff</sub>=10%, VS<sub>perf</sub>=5%, cHb=17 g/100ml )

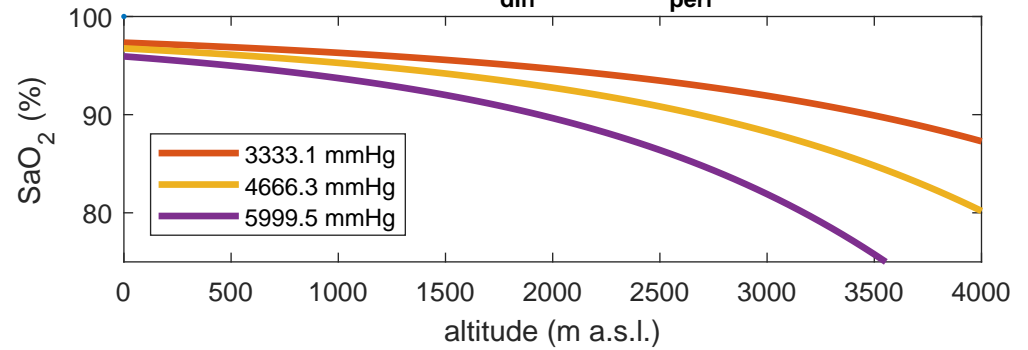

sensitivity cHb (RQ=0.9, VS<sub>diff</sub>=10%, VS<sub>perf</sub>=5%, pACO<sub>2</sub>=4666.3 mmHg, )

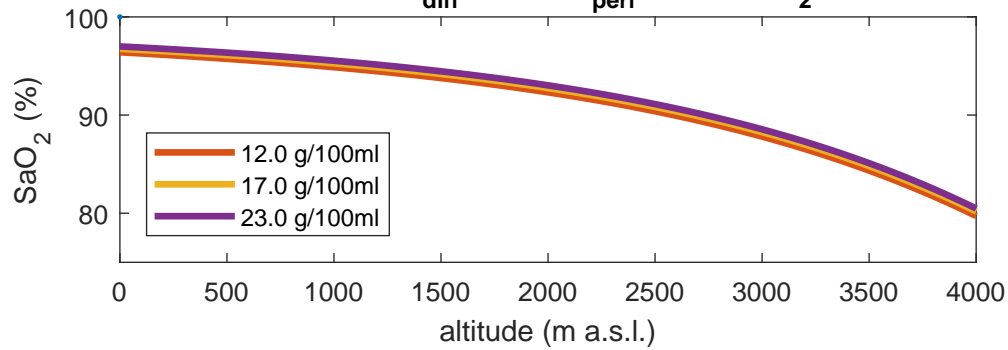

Source: http://biorxiv.org/content/10.1101/334482v2.full.pdf
